# Supplementary material for: Acylation or phosphorylation of hydroxyurea unexpectedly takes place on N rather than on O, leading to the formation of amides instead of the expected esters
Source: Royal Society of Chemistry journal article supplement (doi:10.1039/c5ra01016k), 2015-01-01
Supplement: c5ra01016k1.pdf [file c5ra01016k1.pdf]

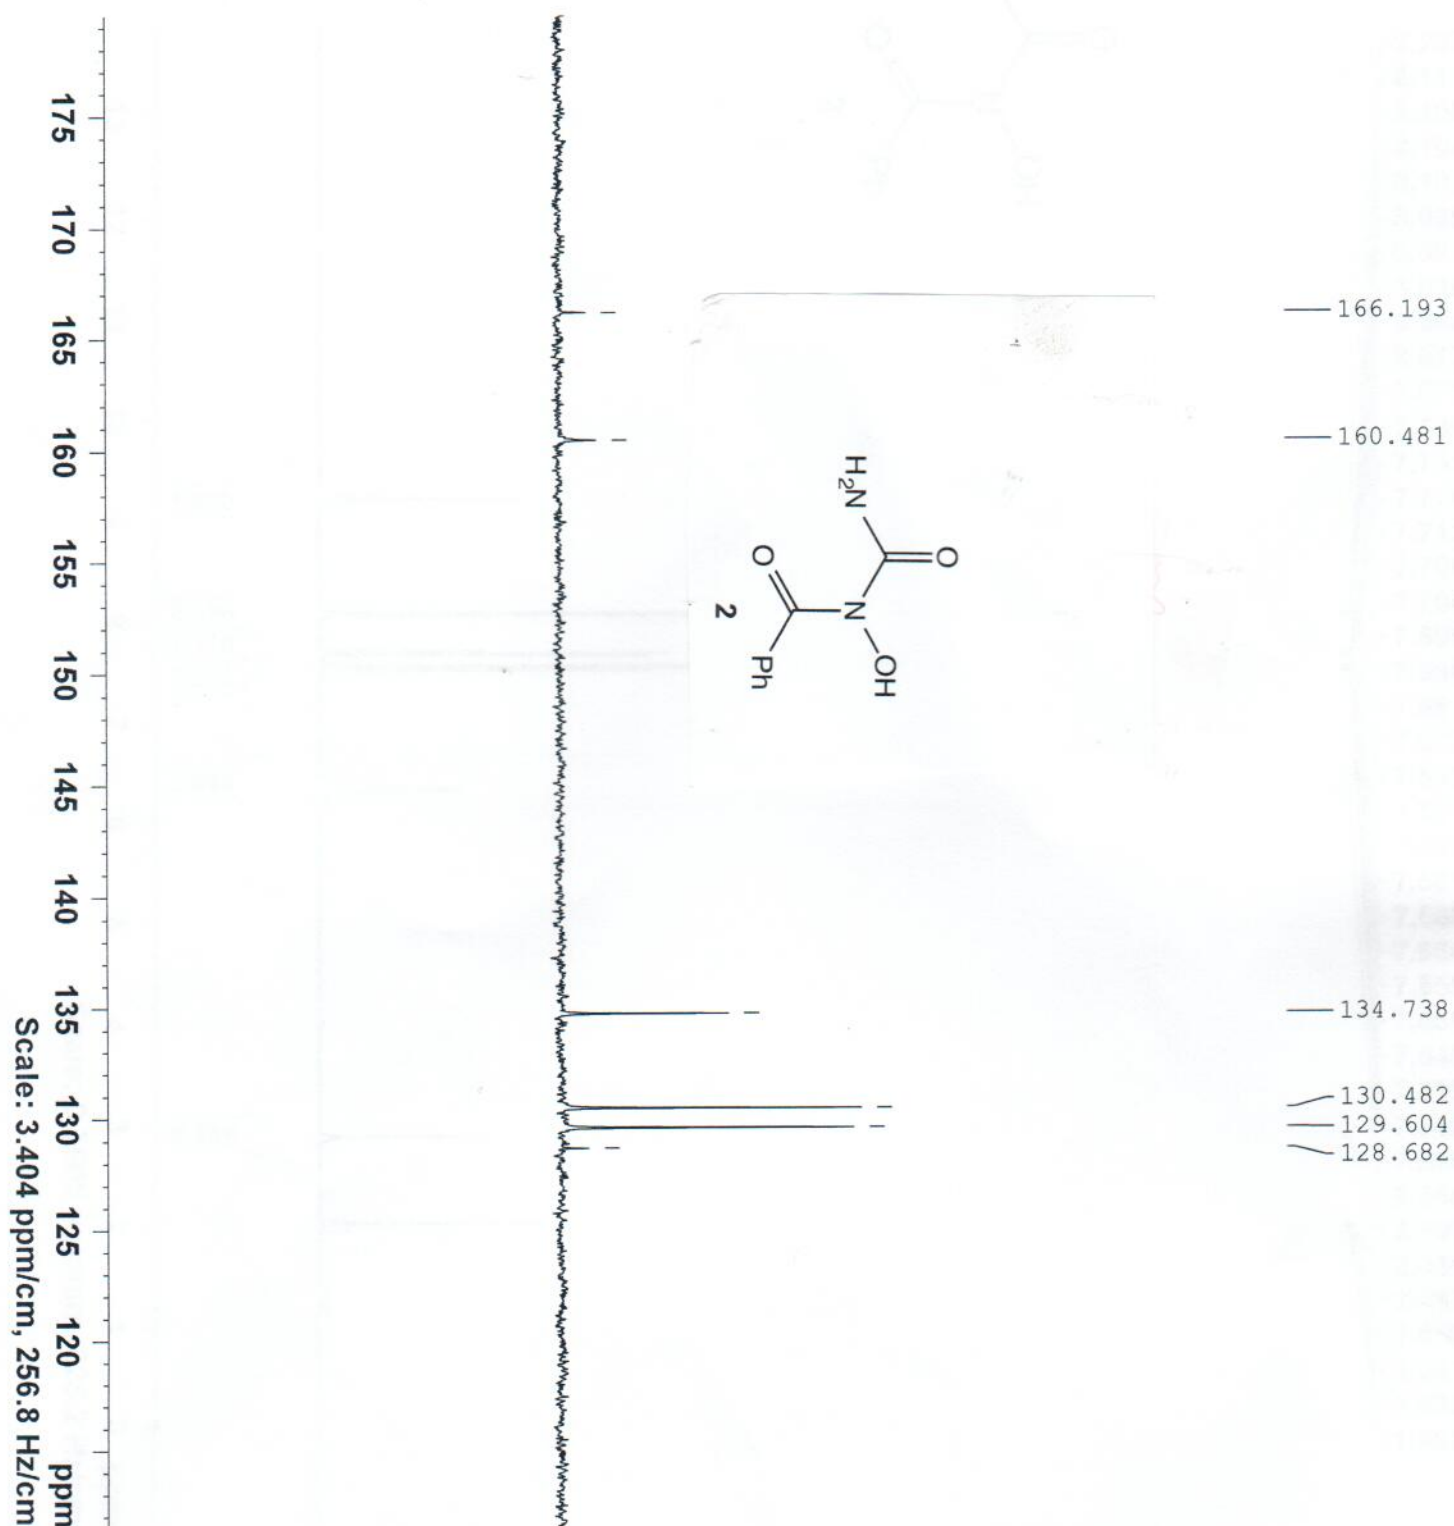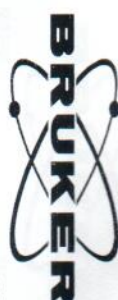

NAME np-326  
EXPNO 2  
PROCNO 1  
Date\_ 20130613  
Time\_ 11.07  
INSTRUM spect  
PROBHD 5 mm DUL 13C-1  
PULPROG zgpg30  
TD 32768  
SOLVENT Acetone  
NS 254  
DS 0  
SWH 19531.250 Hz  
FIDRES 0.596046 Hz  
AQ 0.8389108 sec  
RG 2050  
DW 25.600 usec  
DE 6.50 usec  
TE 300.0 K  
D1 0.10000000 sec  
D11 0.03000000 sec  
TD0 1

===== CHANNEL f1 =====  
NUC1 13C  
P1 11.00 usec  
PL1 -3.00 dB  
PL1W 70.66739655 W  
SFO1 75.4662169 MHz

===== CHANNEL f2 =====  
CPDPRG2 waltz16  
NUC2 1H  
PCPD2 100.00 usec  
PL2 120.00 dB  
PL12 15.90 dB  
PL2W 0.00000000 W  
PL12W 0.37964472 W  
SFO2 300.0882901 MHz  
SI 32768  
SF 75.4570986 MHz  
WDW EM  
SSB 0  
LB 2.00 Hz  
GB 0  
PC 1.50

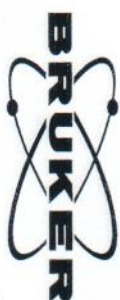

NAME np-326  
EXPNO 1  
PROCNO 1  
Date\_ 20130613  
Time\_ 11.04  
INSTRUM spect  
PROBHD 5 mm DUL 13C-1  
PULPROG zg30  
TD 32768  
SOLVENT Acetone  
NS 16  
DS 0  
SWH 4504.504 Hz  
FIDRES 0.137467 Hz  
AQ 3.6372981 sec  
RG 812  
DW 111.000 usec  
DE 6.50 usec  
TE 300.0 K  
D1 0.10000000 sec  
TD0 1

===== CHANNEL f1 =====  
NUC1 1H  
P1 10.25 usec  
PL1 -3.00 dB  
PL1W 29.46980858 W  
SF01 300.0898506 MHz  
SI 32768  
SF 300.0879080 MHz  
WDW EM  
SSB 0  
LB 0.00 Hz  
GB 0  
PC 1.50

9.237  
8.111  
8.105  
8.104  
8.101  
8.099  
8.097  
8.096  
8.084  
8.077  
8.073  
7.735  
7.731  
7.726  
7.713  
7.706  
7.704  
7.699  
7.686  
7.681  
7.677  
7.591  
7.587  
7.586  
7.581  
7.563  
7.560  
7.559  
7.555  
7.540  
7.535  
7.532  
7.529  
6.356  
2.907  
2.065  
2.057  
2.050  
2.043  
2.035  
1.963

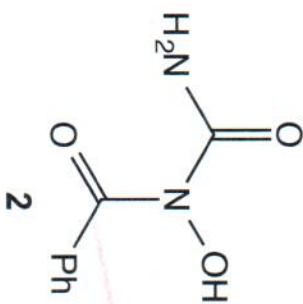

1.000

2.195

1.110

2.222

2.024

0.482

Scale: 0.7505 ppm/cm, 225.2 Hz/cm

174.656  
160.088  
77.314  
77.132  
76.950  
43.401  
34.399  
20.535  
13.898

13C-NMR

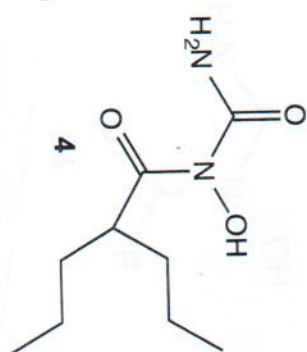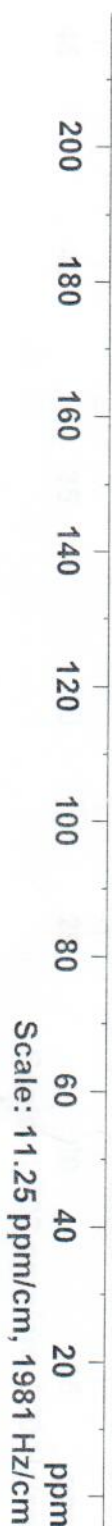

NAME NP-235-6  
EXPNO 2  
PROCNO 1  
Date\_ 20120920  
Time\_ 12.02  
INSTRUM spect  
PROBHD 5 mm CPTCI 1H-  
PULPROG zgpg30  
TD 65356  
SOLVENT CDCl3  
NS 333  
DS 0  
SWH 42613.637 Hz  
FIDRES 0.652023 Hz  
AQ 0.7668937 sec  
RG 1620  
DE 11.733 usec  
TE 20.00 usec  
D1 300.0 K  
D11 0.3000001 sec  
TD0 0.03000000 sec  
1

===== CHANNEL f1 =====  
NUC1 13C  
P1 14.00 usec  
PL1 7.00 dB  
PL1W 18.94487762 W  
SFO1 176.1476671 MHz

===== CHANNEL f2 =====  
CPDPRG2 waltz16  
NUC2 1H  
PCPD2 65.00 usec  
PL2 4.00 dB  
PL12 21.57 dB  
PL2W 9.00000000 W  
PL12W 0.15754785 W  
SFO2 700.4531737 MHz  
SI 65536  
SF 176.1282890 MHz  
WDW EM  
SSB 0  
LB 2.00 Hz  
GB 0  
PC 1.40

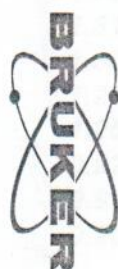

9.140

7.297

5.852

2.986

2.543

2.535

2.530

2.522

2.515

2.510

2.502

1.683

1.670

1.660

1.657

1.654

1.650

1.641

1.637

1.628

1.531

1.523

1.518

1.513

1.500

1.492

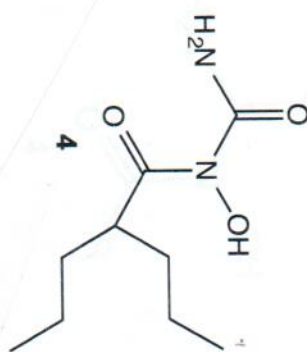

if pure

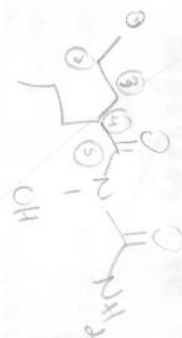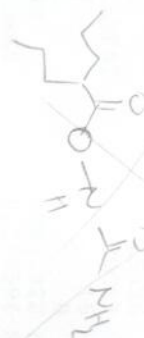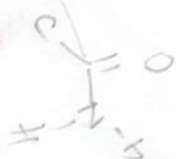

1.000

1.983

0.142

1.273

2.237

2.101

4.721

6.493

NAME NP-235-6  
EXPNO 1  
PROCNO 1  
Date\_ 20120920  
Time 11.57  
INSTRUM spect  
PROBHD 5 mm CPTCI 1H-  
PULPROG zg30  
TD 65536  
SOLVENT CDCl3  
NS 16  
DS 0  
SWH 9803.922 Hz  
FIDRES 0.149596 Hz  
AQ 3.3423860 sec  
RG 4.5  
DW 51.000 usec  
DE 6.50 usec  
TE 300.0 K  
D1 1.00000000 sec  
TD0 1

===== CHANNEL f1 =====  
NUC1 1H  
P1 8.60 usec  
PL1 4.00 dB  
PL1W 9.00000000 W  
SFO1 700.4542027 MHz  
SI 65536  
SF 700.4500043 MHz  
WDW EM  
SSB 0  
LB 0.00 Hz  
GB 0  
PC 1.00

NP-235-6

0003/30K

Scale: 0.6 ppm/cm, 420.3 Hz/cm



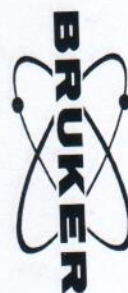

Current Data Parameters  
NAME np-251-1  
EXPNO 2  
PROCNO 1

F2 - Acquisition Parameters

Date\_ 20121018  
Time 11.56  
INSTRUM spect  
PROBHD 5 mm Dual 13C/  
PULPROG zgdc  
TD 32768  
SOLVENT CDCl3  
NS 311  
DS 0  
SWH 19723.865 Hz  
FIDRES 0.601925 Hz  
AQ 0.8307188 sec  
RG 9195.2  
DW 25.350 usec  
DE 9.46 usec  
TE 297.2 K  
D1 0.10000000 sec  
d11 0.03000000 sec  
TD0 1

===== CHANNEL f1 =====  
NUC1 13C  
P1 3.00 usec  
PL1 -5.00 dB  
SFO1 75.4759867 MHz

===== CHANNEL f2 =====  
CPDPRG2 waltz16  
NUC2 1H  
PCPD2 100.00 usec  
PL2 -6.00 dB  
PL12 12.00 dB  
SFO2 300.1312000 MHz

F2 - Processing parameters  
SI 32768  
SF 75.4677410 MHz  
WDW EM  
SSB 0  
LB 2.00 Hz  
GB 0  
PC 1.00

174.906  
174.388

44.150  
43.247  
34.911  
34.472  
20.688  
20.552  
14.087  
13.980

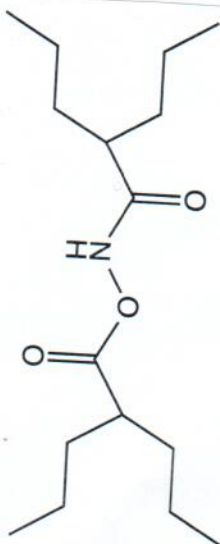

5

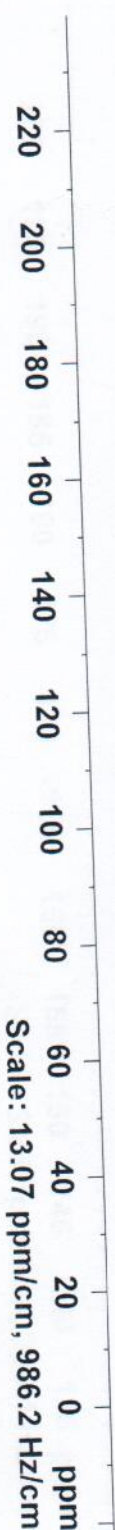

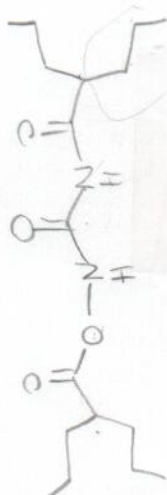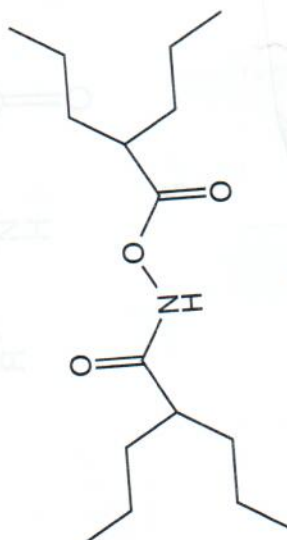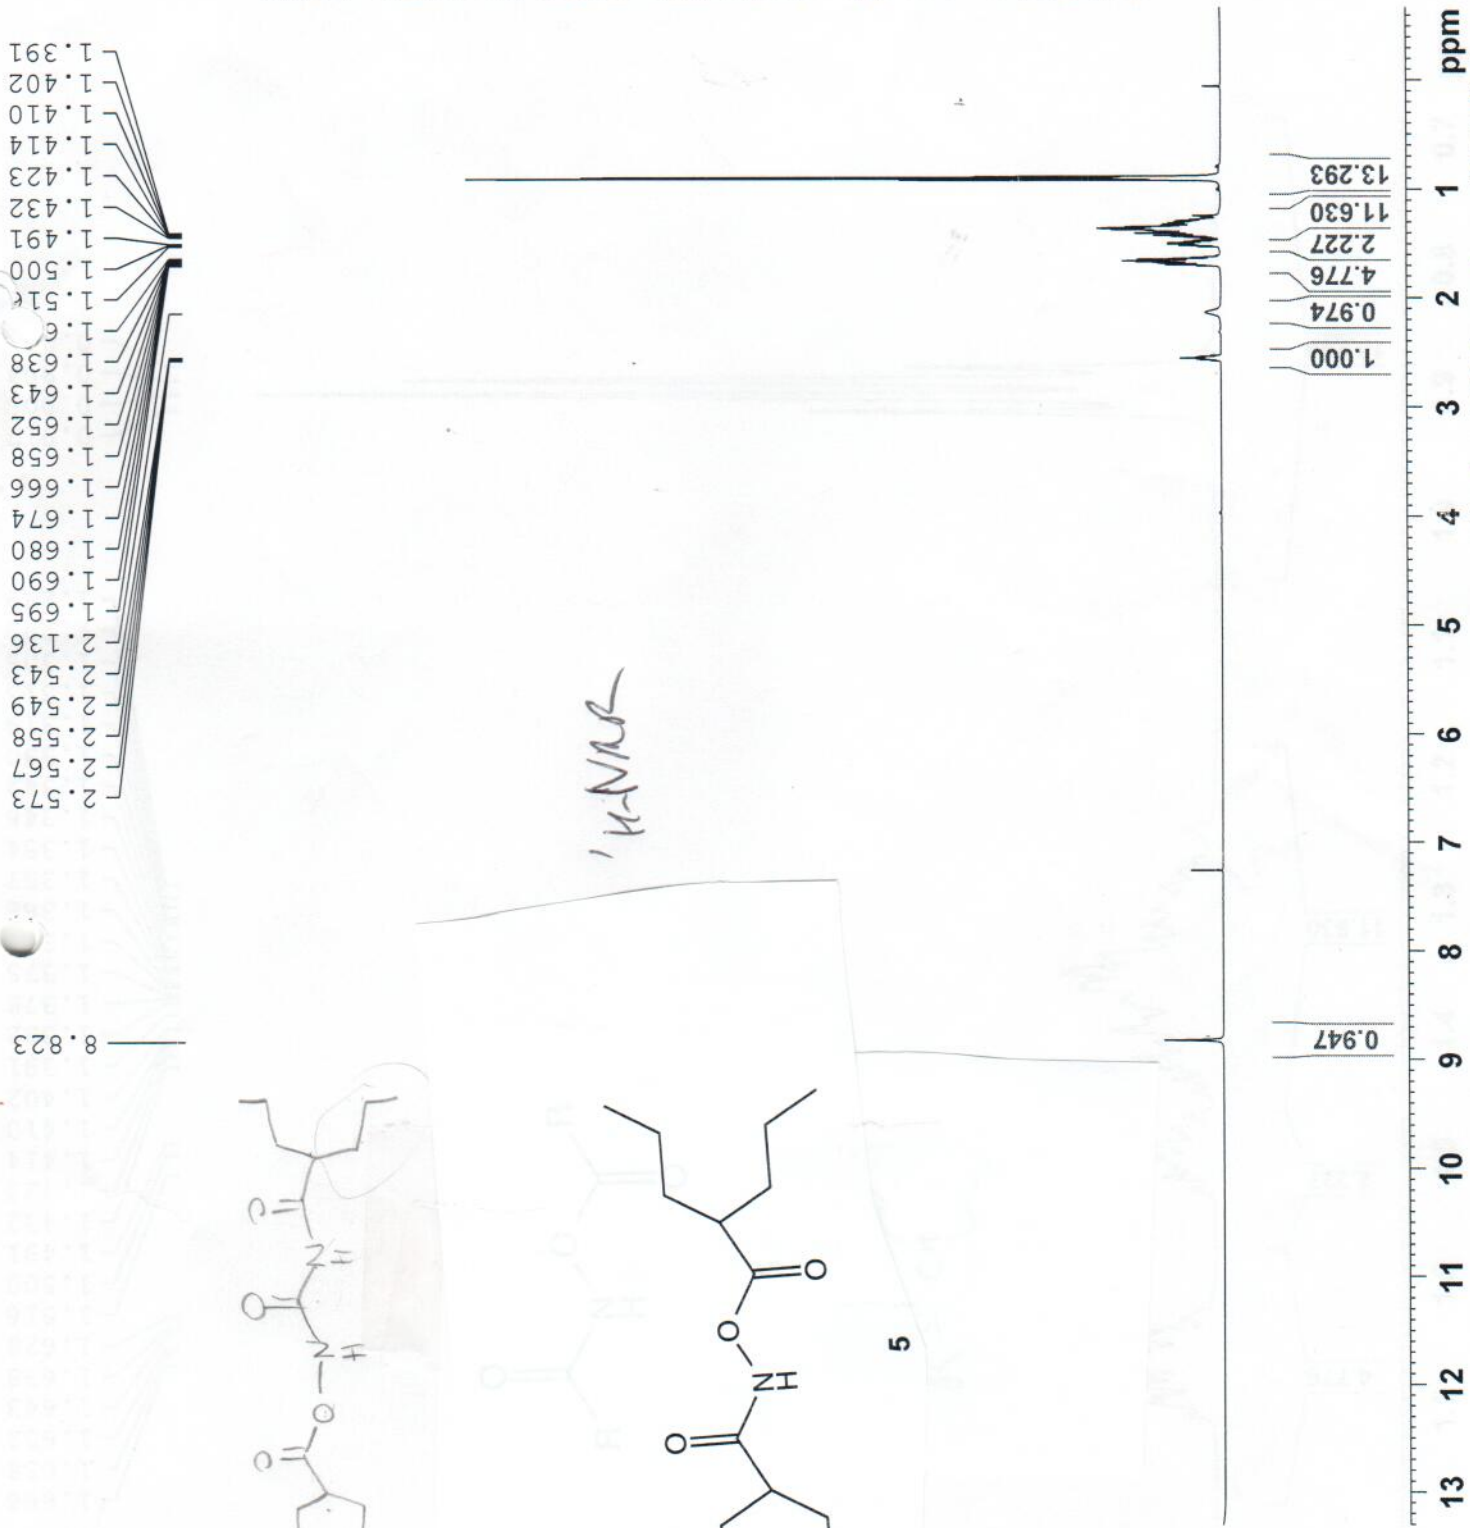

```

Current Data Parameters
NAME      NP232-1
EXPNO     1
PROCNO    1

F2 - Acquisition Parameters
Date_     20120725
Time      10.27
INSTRUM   spect
PROBHD     5 mm QNP 1H/1
PULPROG    zg
TD          65536
SOLVENT     CDC13
NS          24
DS          0
SWH          8389.262 Hz
FIDRES      0.128010 Hz
AQ          3.9059956 sec
RG          128
DW          59.600 usec
DE          5.50 usec
TE          297.7 K
D1          0.50000000 sec
TD0         1

===== CHANNEL f1 =====
NUC1        1H
P1          7.00 usec
PL1         0.00 dB
SFO1        600.1338000 MHz

F2 - Processing parameters
SI          32768
SF          600.1300107 MHz
WDW          EM
SSB          0
LB          0.00 Hz
GB          0
PC          1.00

```

```

===== CHANNEL f1 =====
NUC1      1H
P1         7.00 usec
PL1        0.00 dB
SFO1       600.1338000 MHz

F2 - Processing parameters
SI         32768
SF         600.1300107 MHz
WDW        EM
SSB        0
LB         0.00 Hz
GB         0
PC         1.00

```

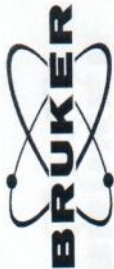

43.335  
38.805  
34.522  
27.332  
20.604  
14.039

176.966  
175.281

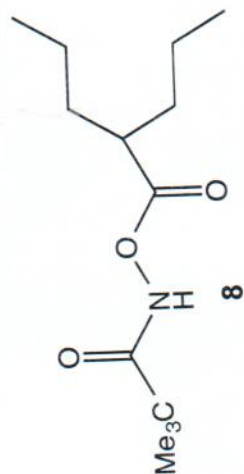

<sup>13</sup>C-NMR

NAME NP-322  
EXPNO 4  
PROCNO 1  
Date\_ 20130513  
Time\_ 14.31  
INSTRUM spect  
PROBHD 5 mm PABBO BB-  
PULPROG zgdc30  
TD 32768  
SOLVENT CDC13  
NS 341  
DS 0  
SWH 24154.590 Hz  
FIDRES 0.737140 Hz  
AQ 0.6783476 sec  
RG 71.8  
DW 20.700 usec  
DE 12.00 usec  
TE 300.8 K  
D1 0.10000000 sec  
D11 0.03000000 sec  
TD0 1

===== CHANNEL f1 =====  
NUC1 13C  
P1 9.20 usec  
PL1 3.00 dB  
SFO1 100.6162926 MHz

===== CHANNEL f2 =====  
CPDPRG2 waltz16  
NUC2 1H  
PCPD2 80.00 usec  
PL2 0.00 dB  
PL12 18.00 dB  
SFO2 400.1009202 MHz  
SI 32768  
SF 100.6052113 MHz  
WDW EM  
SSB 0  
LB 2.00 Hz  
GB 0  
PC 1.00

ppm 220 200 180 160 140 120 100 80 60 40 20  
Scale: 42 ppm/cm 1208 Hz/cm



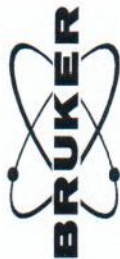

NAME NP-322  
 EXPNO 3  
 PROCNO 1  
 Date\_ 20130513  
 Time\_ 14.25  
 INSTRUM spect  
 PROBHD 5 mm PABBO BB-  
 PULPROG zg30  
 TD 65536  
 SOLVENT CDCl3  
 NS 28  
 DS 0  
 SWH 7183.908 Hz  
 FIDRES 0.109618 Hz  
 AQ 4.5613556 sec  
 RG 71.8  
 DW 69.600 usec  
 DE 6.50 usec  
 TE 299.9 K  
 D1 0.10000000 sec  
 TD0 1

===== CHANNEL f1 =====  
 NUC1 1H  
 P1 10.10 usec  
 PL1 0.00 dB  
 SFO1 400.1032008 MHz  
 SI 32768  
 SF 400.1000105 MHz  
 WDW EM  
 SSB 0  
 LB 0.00 Hz  
 GB 0  
 PC 1.00

2.582  
2.573  
2.568  
2.560  
2.551  
2.546  
2.538  
1.700  
1.694  
1.689  
1.684  
1.675  
1.665  
1.652  
1.643  
1.629  
1.484  
1.392  
1.385  
1.373  
1.367

9.011

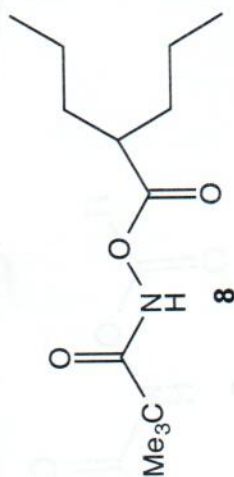

<sup>1</sup>H-NMR

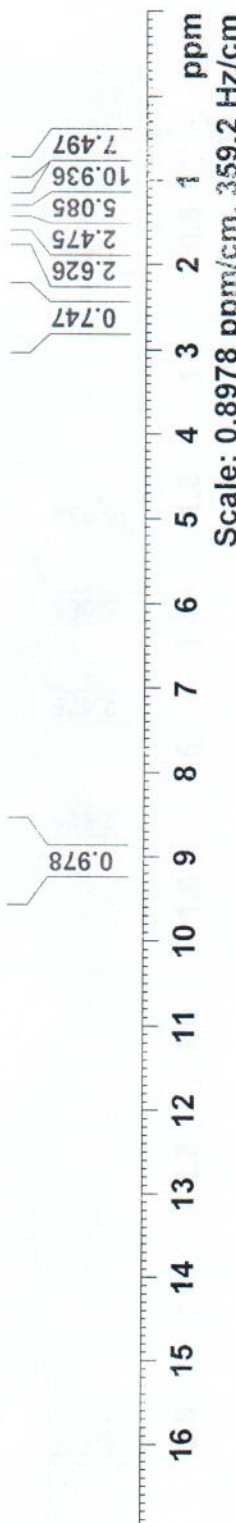



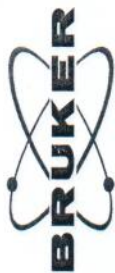

NP-306-2  
EXPNO 4  
PROCNO 1  
Date\_ 20130317  
Time 10.42  
INSTRUM spect  
PROBHD 5 mm PABBO BB-  
PULPROG zgpg30  
TD 32768  
SOLVENT CDCl3  
NS 71  
DS 0  
SWH 24154.590 Hz  
FIDRES 0.737140 Hz  
AQ 0.6783476 sec  
RG 71.8  
DW 20.700 usec  
DE 12.00 usec  
TE 300.0 K  
D1 0.10000000 sec  
D11 0.03000000 sec  
TD0 1

===== CHANNEL f1 =====  
NUC1 13C  
P1 9.20 usec  
PL1 3.00 dB  
SFO1 100.6162926 MHz

===== CHANNEL f2 =====  
CPDPRG2 waltz16  
NUC2 1H  
PCPD2 80.00 usec  
PL2 0.00 dB  
PL12 18.00 dB  
SFO2 400.1009202 MHz  
SI 32768  
SF 100.6052169 MHz  
WDW EM  
SSB 0  
LB 2.00 Hz  
GB 0  
PC 1.00

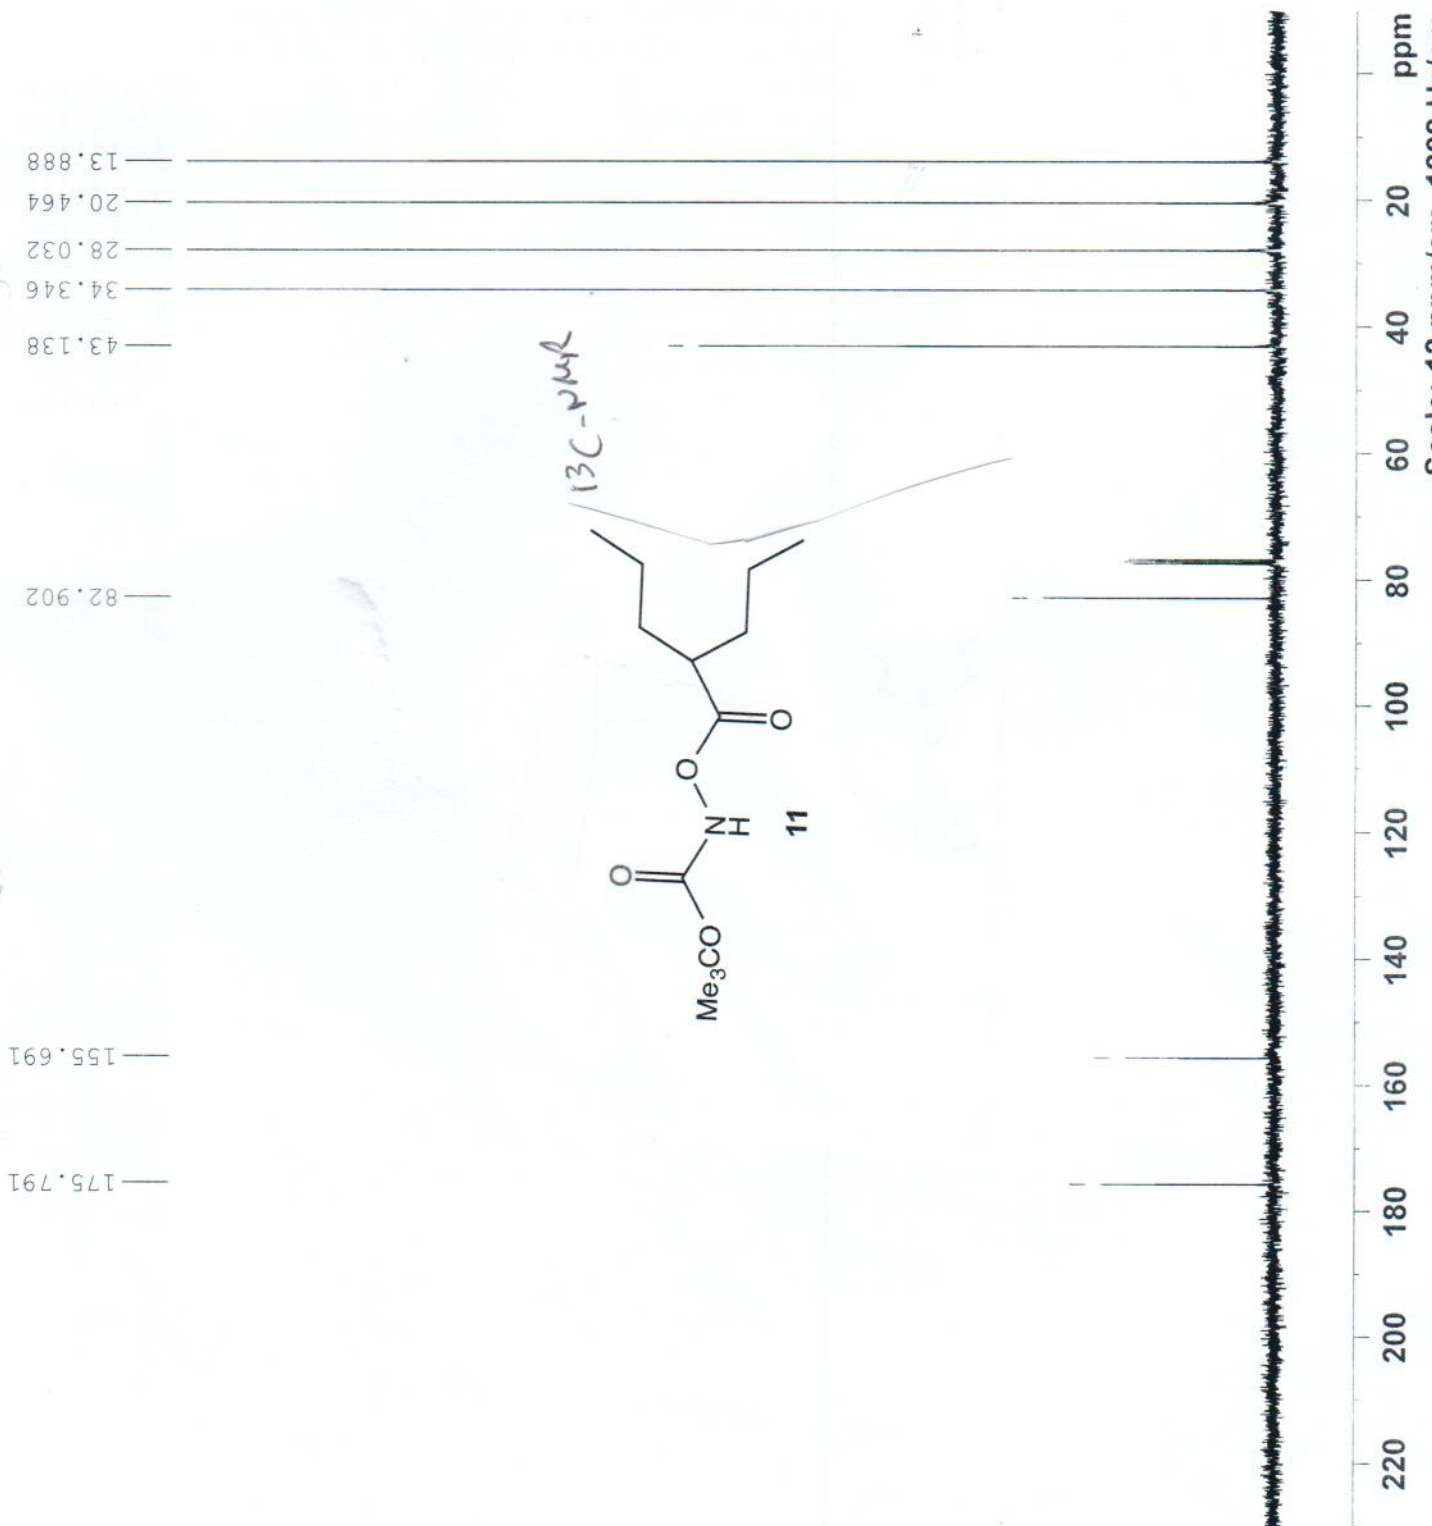

major

2.491  
2.483  
2.478  
2.470  
2.461  
2.456  
2.447  
1.929  
1.665  
1.649  
1.643  
1.631  
1.627  
1.620  
1.617  
1.608  
1.605  
1.594  
1.585  
1.571  
1.477  
1.464  
1.460  
1.454  
1.446  
1.441  
1.430  
1.412  
1.410  
1.404  
1.391  
1.347  
1.341  
1.333  
1.329  
1.323  
1.314  
1.310  
1.308  
1.305  
1.299  
1.296  
1.292  
1.289  
1.287  
1.282  
1.278  
1.273  
1.264  
0.871  
0.853  
0.835

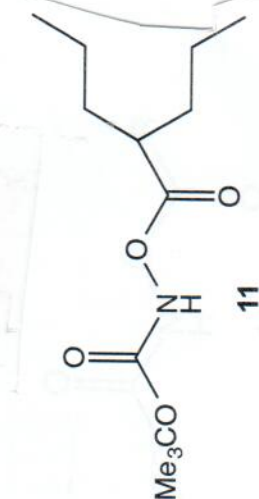

*1H-NMR*

NAME NP-306-2  
EXPNO 3  
PROCNO 1  
Date\_ 20130317  
Time\_ 10.39  
INSTRUM spect  
PROBHD 5 mm PABBO BB-  
PULPROG zg30  
TD 65536  
SOLVENT CDCl<sub>3</sub>  
NS 4  
DS 0  
SWH 7183.908 Hz  
FIDRES 0.109618 Hz  
AQ 4.5613556 sec  
RG 9  
DW 69.600 usec  
DE 6.50 usec  
TE 299.5 K  
D1 0.10000000 sec  
TD0 1

===== CHANNEL f1 =====  
NUC1 1H  
P1 10.10 usec  
PL1 0.00 dB  
SFO1 400.1032008 MHz  
SI 32768  
SF 400.1000101 MHz  
WDW EM  
SSB 0  
LB 0.00 Hz  
GB 0  
PC 1.00

1.023  
2.213  
11.889  
4.808  
6.668

16 15 14 13 12 11 10 9 8 7 6 5 4 3 2 1 ppm  
Scale: 0.8978 nm/cm 359.2 Hz/cm

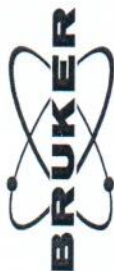

NAME NP-302-B  
EXPNO 1  
PROCNO 1  
Date\_ 20130306  
Time\_ 8.54  
INSTRUM spect  
PROBHD 5 mm PABBO BB-  
PULPROG zgdc30  
TD 32768  
SOLVENT Acetone  
NS 591  
DS 0  
SWH 24154.590 Hz  
FIDRES 0.737140 Hz  
AQ 0.6783476 sec  
RG 71.8  
DW 20.700 usec  
DE 12.00 usec  
TE 299.7 K  
D1 0.10000000 sec  
D11 0.03000000 sec  
TDO 1

===== CHANNEL f1 =====  
NUC1 13C  
P1 9.20 usec  
PL1 3.00 dB  
SFO1 100.6162926 MHz

===== CHANNEL f2 =====  
CPDPRG2 waltz16  
NUC2 1H  
PCPD2 80.00 usec  
PL2 0.00 dB  
PL12 18.00 dB  
SFO2 400.1009202 MHz  
SI 32768  
SF 100.6051385 MHz  
WDW EM  
SSB 0  
LB 2.00 Hz  
GB 0  
PC 1.00

$^{13}\text{C}$ -NMR

161.588  
65.760  
65.700  
29.842  
16.427  
16.364

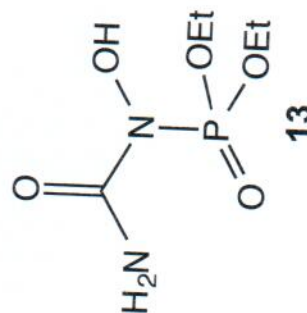

220 200 180 160 140 120 100 80 60 40 20 ppm  
Scale: 12 ppm/cm, 1208 Hz/cm



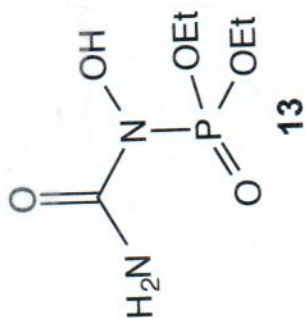

9.178

6.442  
4.271  
4.267  
4.253  
4.250  
4.249  
4.232  
4.230  
4.229  
4.215  
4.211  
4.197  
4.194  
3.018  
1.347  
1.346  
1.345  
1.330  
1.327  
1.312  
1.309

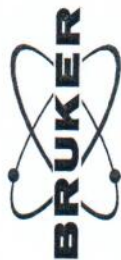

NAME NP-302-B  
EXPNO 2  
PROCNO 1  
Date\_ 20130306  
Time\_ 8.50  
INSTRUM spect  
PROBHD 5 mm PABBO BB-  
PULPROG zg30  
TD 65536  
SOLVENT Acetone  
NS 32  
DS 0  
SWH 7183.908 Hz  
FIDRES 0.109618 Hz  
AQ 4.5613556 sec  
RG 71.8  
DW 69.600 usec  
DE 6.50 usec  
TE 299.1 K  
D1 0.1000000 sec  
TD0 1

===== CHANNEL f1 =====  
NUC1 1H  
P1 10.10 usec  
PL1 0.00 dB  
SF01 400.1032008 MHz  
SI 32768  
SF 400.1000028 MHz  
WDW EM  
SSB 0  
LB 0.00 Hz  
GB 0  
PC 1.00

<sup>1</sup>H-NMR

CH<sub>3</sub>

HO

CH<sub>2</sub>

NH<sub>2</sub>

OH

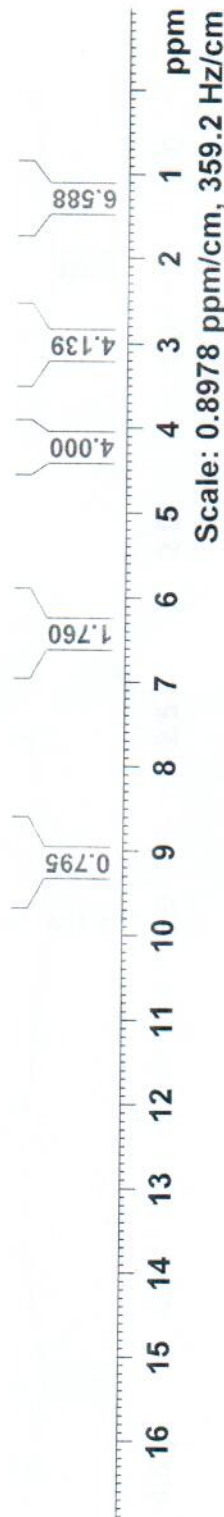

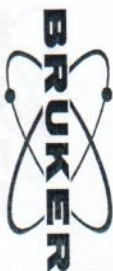

31P-NMR

1.164

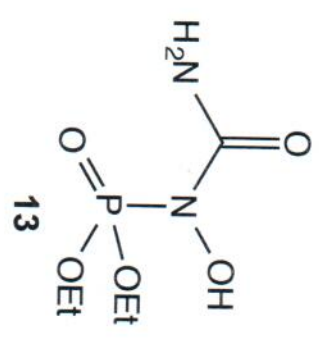

NAME NP-302-B  
EXPNO 4  
PROCNO 1  
Date\_ 20130306  
Time 9.10  
INSTRUM spect  
PROBHD 5 mm PABBO BB-  
PULPROG zgdc30  
TD 32768  
SOLVENT Acetone  
NS 120  
DS 0  
SWH 48661.801 Hz  
FIDRES 1.485040 Hz  
AQ 0.3367412 sec  
RG 11585.2  
DW 10.275 usec  
DE 14.68 usec  
TE 299.6 K  
D1 0.10000000 sec  
D11 0.03000000 sec  
TD0 1

===== CHANNEL f1 =====  
NUC1 31P  
PI 7.70 usec  
PL1 3.00 dB  
SFO1 161.9634490 MHz

===== CHANNEL f2 =====  
CPDPRG2 waltz16  
NUC2 1H  
PCPD2 80.00 usec  
PL2 0.00 dB  
PL12 18.00 dB  
SFO2 400.1009202 MHz  
SI 32768  
SF 161.9633359 MHz  
WDW EM  
SSB 0  
LB 2.00 Hz  
GB 0  
PC 1.00

100 50 0 -50 -100 ppm  
Scale: 15.02 ppm/cm, 2433 Hz/cm
